# Supplementary material
Source: PubMed Central journal article supplement (PMC3102536)
Supplement: NIHMS153688-supplement-1_si_001.pdf [file NIHMS153688-supplement-1_si_001.pdf]

# Supporting Information

## **Tripodal Binding Units for Self-Assembled Monolayers on Gold: A Comparison of Thiol and Thioether Headgroups**

**Tobias Weidner,<sup>1\*</sup> Nirmalya Ballav,<sup>2,#</sup> Ulrich Siemeling,<sup>3</sup> Dennis Troegel,<sup>4</sup> Tim Walter,<sup>4</sup>  
Reinhold Tacke,<sup>4\*</sup> David G. Castner,<sup>1</sup> and Michael Zharnikov<sup>2\*</sup>**

<sup>1</sup> National ESCA and Surface Analysis Center for Biomedical Problems (NESAC/BIO), Departments of Bioengineering and Chemical Engineering, University of Washington, Seattle, WA 98195, USA

<sup>2</sup> Angewandte Physikalische Chemie, Universität Heidelberg, 69120 Heidelberg, Germany

<sup>3</sup> Institut für Chemie and Center for Interdisciplinary Nanostructure Science and Technology (CINSaT), Universität Kassel, 34109 Kassel, Germany

<sup>4</sup> Institut für Anorganische Chemie, Universität Würzburg, Am Hubland, 97074 Würzburg, Germany

\* Authors to whom correspondence should be addressed: M. Z.; phone: +49-6221-54 4921; fax: +49-6221-54 6199; e-mail: Michael.Zharnikov@urz.uni-heidelberg.de; T. W.; phone:+1-206-685-0452; fax: +1-206-543-3778; e-mail: weidner@nb.engr.washington.edu; R. T.; phone: +49-931-31-85250; fax: +49-931-888-4609; e-mail: r.tacke@uni-wuerzburg.de.

# Present address: Laboratory for Micro and Nanotechnology, Paul Scherrer Institut, 5232 Villigen, Switzerland

## NMR-Spectroscopic Characterization and Elemental Analyses of **1a**, **1b**, **2a**, **2b**, PTT, and BPTT:

NMR experiments: The  $^1\text{H}$ ,  $^{13}\text{C}\{^1\text{H}\}$ , and  $^{29}\text{Si}\{^1\text{H}\}$  NMR spectra were recorded at 23 °C on a Bruker DRX-300 ( $^1\text{H}$ , 300.1 MHz;  $^{13}\text{C}$ , 75.5 MHz;  $^{29}\text{Si}$ , 59.6 MHz) or a Bruker Avance 500 NMR spectrometer ( $^1\text{H}$ , 500.1 MHz;  $^{13}\text{C}$ , 125.8 MHz;  $^{29}\text{Si}$ , 99.4 MHz).  $\text{CDCl}_3$  was used as the solvent. Chemical shifts (ppm) were determined relative to internal  $\text{CHCl}_3$  ( $^1\text{H}$ ,  $\delta$  7.24),  $\text{CDCl}_3$  ( $^{13}\text{C}$ ,  $\delta$  77.0), or external TMS ( $^{29}\text{Si}$ ,  $\delta$  0). Analysis and assignment of the  $^1\text{H}$  NMR data were supported by  $^1\text{H},^1\text{H}$  COSY,  $^{13}\text{C},^1\text{H}$  HMQC, and  $^{13}\text{C},^1\text{H}$  HMBC experiments. Assignment of the  $^{13}\text{C}$  NMR data was supported by DEPT 135,  $^{13}\text{C},^1\text{H}$  HMQC, and  $^{13}\text{C},^1\text{H}$  HMBC experiments.

Elemental analyses: The elemental analyses were performed by using an Elementar VarioMicro system.

### *Tris(chloromethyl)phenylsilane (1a)*

$^1\text{H}$  NMR (300.1 MHz,  $\text{CDCl}_3$ ):  $\delta$  3.29 (s, 6 H,  $\text{CH}_2$ ), 7.40–7.49 (m, 3 H,  $H$ -3/ $H$ -4/ $H$ -5,  $\text{C}_6\text{H}_5$ ), 7.65–7.68 (m, 2 H,  $H$ -2/ $H$ -6,  $\text{C}_6\text{H}_5$ ).  $^{13}\text{C}$  NMR (75.5 MHz,  $\text{CDCl}_3$ ):  $\delta$  24.5 ( $\text{CH}_2$ ), 128.4 ( $C$ -3/ $C$ -5,  $\text{C}_6\text{H}_5$ ), 131.2 ( $C$ -4,  $\text{C}_6\text{H}_5$ ), 134.0 ( $C$ -1,  $\text{C}_6\text{H}_5$ ), 134.6 ( $C$ -2/ $C$ -6,  $\text{C}_6\text{H}_5$ ).  $^{29}\text{Si}$  NMR (59.6 MHz,  $\text{CDCl}_3$ ):  $\delta$  –8.2. Anal. calcd for  $\text{C}_9\text{H}_{11}\text{Cl}_3\text{Si}$ : C, 42.62; H, 4.37. The elemental analysis could not be performed due to the high chlorine content (> 40%) of **1a**.

### *(4-Biphenyl)tris(chloromethyl)silane (1b)*

$^1\text{H}$  NMR (300.1 MHz,  $\text{CDCl}_3$ ):  $\delta$  3.32 (s, 6 H,  $\text{CH}_2$ ), 7.34–7.40 (m, 1 H,  $H$ -4,  $\text{C}_6\text{H}_5$ ), 7.42–7.48 (m, 2 H,  $H$ -3/ $H$ -5,  $\text{C}_6\text{H}_5$ ), 7.57–7.61 (m, 2 H,  $H$ -2/ $H$ -6,  $\text{C}_6\text{H}_5$ ), 7.64–7.67 (m, 2 H,  $H$ -2/ $H$ -6,  $\text{C}_6\text{H}_4$ ), 7.73–7.76 (m, 2 H,  $H$ -3/ $H$ -5,  $\text{C}_6\text{H}_4$ ).  $^{13}\text{C}$  NMR (75.5 MHz,  $\text{CDCl}_3$ ):  $\delta$  24.5 ( $\text{CH}_2$ ), 127.0 ( $C$ -4,  $\text{C}_6\text{H}_4$ ), 127.1 and 127.2 ( $C$ -2/ $C$ -6,  $\text{C}_6\text{H}_5$ ;  $C$ -2/ $C$ -6,  $\text{C}_6\text{H}_4$ ), 127.9 ( $C$ -4,  $\text{C}_6\text{H}_5$ ), 128.9 ( $C$ -3/ $C$ -5,  $\text{C}_6\text{H}_5$ ), 135.1 ( $C$ -3/ $C$ -5,  $\text{C}_6\text{H}_4$ ), 140.4 ( $C$ -1,  $\text{C}_6\text{H}_5$ ), 144.0 ( $C$ -1,  $\text{C}_6\text{H}_4$ ).  $^{29}\text{Si}$  NMR (59.6 MHz,  $\text{CDCl}_3$ ):  $\delta$  –8.0. Anal. calcd for  $\text{C}_{15}\text{H}_{15}\text{Cl}_3\text{Si}$ : C, 54.64; H, 4.59. Found: C, 54.8; H, 4.5.

*Tris(acetylthiomethyl)phenylsilane (2a)*

$^1\text{H}$  NMR (300.1 MHz,  $\text{CDCl}_3$ ):  $\delta$  2.30 (s, 9 H,  $\text{CH}_3$ ), 2.47 (s, 6 H,  $\text{CH}_2$ ), 7.33–7.43 (m, 3 H,  $H$ -3/ $H$ -4/ $H$ -5,  $\text{C}_6\text{H}_5$ ), 7.47–7.52 (m, 2 H,  $H$ -2/ $H$ -6,  $\text{C}_6\text{H}_5$ ).  $^{13}\text{C}$  NMR (75.5 MHz,  $\text{CDCl}_3$ ):  $\delta$  9.8 ( $\text{CH}_2$ ), 30.1 ( $\text{CH}_3$ ), 128.2 ( $C$ -3/ $C$ -5,  $\text{C}_6\text{H}_5$ ), 130.7 ( $C$ -4,  $\text{C}_6\text{H}_5$ ), 131.1 ( $C$ -1,  $\text{C}_6\text{H}_5$ ), 134.1 ( $C$ -2/ $C$ -6,  $\text{C}_6\text{H}_5$ ), 195.4 ( $\text{C}=\text{O}$ ).  $^{29}\text{Si}$  NMR (59.6 MHz,  $\text{CDCl}_3$ ):  $\delta$  -4.8. Anal. calcd for  $\text{C}_{15}\text{H}_{20}\text{O}_3\text{S}_3\text{Si}$ : C, 48.35; H, 5.41; S, 25.82. Found: C, 48.4; H, 5.4; S, 26.2.

*Tris(acetylthiomethyl)(4-biphenyl)silane (2b)*

$^1\text{H}$  NMR (300.1 MHz,  $\text{CDCl}_3$ ):  $\delta$  2.31 (s, 9 H,  $\text{CH}_3$ ), 2.51 (s, 6 H,  $\text{CH}_2$ ), 7.31–7.37 (m, 1 H,  $H$ -4,  $\text{C}_6\text{H}_5$ ), 7.40–7.46 (m, 2 H,  $H$ -3/ $H$ -5,  $\text{C}_6\text{H}_5$ ), 7.56–7.63 (m, 6 H,  $H$ -2/ $H$ -6,  $\text{C}_6\text{H}_5$ ,  $H$ -2/ $H$ -3/ $H$ -5/ $H$ -6,  $\text{C}_6\text{H}_4$ ).  $^{13}\text{C}$  NMR (75.5 MHz,  $\text{CDCl}_3$ ):  $\delta$  9.8 ( $\text{CH}_2$ ), 30.0 ( $\text{CH}_3$ ), 126.8 and 127.0 ( $C$ -2/ $C$ -6,  $\text{C}_6\text{H}_5$ ,  $C$ -2/ $C$ -6,  $\text{C}_6\text{H}_4$ ), 127.7 ( $C$ -4,  $\text{C}_6\text{H}_5$ ), 128.8 ( $C$ -3/ $C$ -5,  $\text{C}_6\text{H}_5$ ), 129.7 ( $C$ -4,  $\text{C}_6\text{H}_4$ ), 134.6 ( $C$ -3/ $C$ -5,  $\text{C}_6\text{H}_4$ ), 140.3 ( $C$ -1,  $\text{C}_6\text{H}_5$ ), 143.3 ( $C$ -1,  $\text{C}_6\text{H}_4$ ), 195.3 ( $\text{C}=\text{O}$ ).  $^{29}\text{Si}$  NMR (59.6 MHz,  $\text{CDCl}_3$ ):  $\delta$  -4.7. Anal. calcd for  $\text{C}_{21}\text{H}_{24}\text{O}_3\text{S}_3\text{Si}$ : C, 56.21; H, 5.39; S, 21.44. Found: C, 55.9; H, 5.3; S, 22.2.

*Tris(mercaptomethyl)phenylsilane (PTT)*

$^1\text{H}$  NMR (300.1 MHz,  $\text{CDCl}_3$ ):  $\delta$  1.31 (t,  $^3J_{\text{HH}} = 7.5$  Hz, 3 H,  $\text{SH}$ ), 2.13 (d,  $^3J_{\text{HH}} = 7.5$  Hz, 6 H,  $\text{CH}_2$ ), 7.38–7.46 (m, 3 H,  $H$ -3/ $H$ -4/ $H$ -5,  $\text{C}_6\text{H}_5$ ), 7.55–7.60 (m, 2 H,  $H$ -2/ $H$ -6,  $\text{C}_6\text{H}_5$ ).  $^{13}\text{C}$  NMR (75.5 MHz,  $\text{CDCl}_3$ ):  $\delta$  2.72 ( $\text{CH}_2$ ), 128.4 ( $C$ -3/ $C$ -5,  $\text{C}_6\text{H}_5$ ), 130.6 ( $C$ -4,  $\text{C}_6\text{H}_5$ ), 131.0 ( $C$ -1,  $\text{C}_6\text{H}_5$ ), 134.5 ( $C$ -2/ $C$ -6,  $\text{C}_6\text{H}_5$ ).  $^{29}\text{Si}$  NMR (59.6 MHz,  $\text{CDCl}_3$ ):  $\delta$  -2.3. Anal. calcd for  $\text{C}_9\text{H}_{14}\text{S}_3\text{Si}$ : C, 43.85; H, 5.72; S, 39.03. Found: C, 43.8; H, 5.4; S, 39.3.

*(4-Biphenyl)tris(mercaptomethyl)silane (BPTT)*

$^1\text{H}$  NMR (500.1 MHz,  $\text{CDCl}_3$ ):  $\delta$  1.36 (t,  $^3J_{\text{HH}} = 7.5$  Hz, 3 H,  $\text{SH}$ ), 2.16 (d,  $^3J_{\text{HH}} = 7.5$  Hz, 6 H,  $\text{CH}_2$ ), 7.34–7.38 (m, 1 H,  $H$ -4,  $\text{C}_6\text{H}_5$ ), 7.42–7.49 (m, 2 H,  $H$ -3/ $H$ -5,  $\text{C}_6\text{H}_5$ ), 7.58–7.61 (m, 2 H,  $H$ -2/ $H$ -6,  $\text{C}_6\text{H}_5$ ), 7.63–7.67 (m, 4 H,  $H$ -2/ $H$ -3/ $H$ -5/ $H$ -6,  $\text{C}_6\text{H}_4$ ).  $^{13}\text{C}$  NMR (125.8 MHz,  $\text{CDCl}_3$ ):  $\delta$  2.80 ( $\text{CH}_2$ ), 127.06 and 127.13 ( $C$ -2/ $C$ -6,  $\text{C}_6\text{H}_5$ ,  $C$ -2/ $C$ -6,  $\text{C}_6\text{H}_4$ ), 127.8 ( $C$ -4,  $\text{C}_6\text{H}_5$ ), 128.9 ( $C$ -3/ $C$ -5,  $\text{C}_6\text{H}_5$ ), 129.6 ( $C$ -4,  $\text{C}_6\text{H}_4$ ), 135.0 ( $C$ -3/ $C$ -5,  $\text{C}_6\text{H}_4$ ), 140.5 ( $C$ -1,  $\text{C}_6\text{H}_5$ ), 143.4 ( $C$ -1,  $\text{C}_6\text{H}_4$ ).  $^{29}\text{Si}$  NMR (99.4 MHz,  $\text{CDCl}_3$ ):  $\delta$  -2.5. Anal. calcd for  $\text{C}_{15}\text{H}_{18}\text{S}_3\text{Si}$ : C, 55.85; H, 5.62; S, 29.82. Found: C, 55.6; H, 5.5; S, 29.9.

**Selected Crystallographic Data for BPTT:**

Single crystal of dimensions  $0.202 \times 0.150 \times 0.045$  mm obtained by crystallization from *n*-hexane/diethyl ether (20:9 (v/v)) at  $-20$  °C,  $C_{15}H_{18}S_3Si$ ,  $M_r = 322.56$ , analysis at 100(2) K, triclinic, space group *P1* (no. 2),  $a = 7.3288(3)$ ,  $b = 12.9975(5)$ ,  $c = 17.1071(6)$  Å,  $\alpha = 97.650(2)$ ,  $\beta = 97.306(2)$ ,  $\gamma = 90.558(2)^\circ$ ,  $V = 1601.35(11)$  Å<sup>3</sup>,  $Z = 4$ ,  $\rho_{\text{calcd}} = 1.338$  g cm<sup>-3</sup>,  $\mu = 0.522$  mm<sup>-1</sup>,  $F(000) = 680$ ,  $2\theta_{\text{max}} = 66.76^\circ$ , 86196 collected reflections, 12267 unique reflections ( $R_{\text{int}} = 0.0429$ ). 349 parameters,  $S = 1.038$ ,  $R_1 = 0.0341$  ( $I > 2\sigma(I)$ ),  $wR_2$  (all data) = 0.1033, max./min. residual electron density  $+0.793/-0.767$  e Å<sup>-3</sup>.
